# Supplementary material for: CHD5 inhibits metastasis of neuroblastoma
Source: PubMed Central journal article supplement (PMC8799470; doi:10.1038/s41388-021-02081-0), 2021-11-17
Supplement: 41388_2021_2081_MOESM1_ESM.pdf [file 41388_2021_2081_MOESM1_ESM.pdf]

## Supplementary Information

### Supplementary Materials and Methods

#### *Cell culture*

The human neuroblastoma cell lines SK-N-BE(2)C, was purchased from ATCC (Cat# CRL-2268, Wesel, Germany) and cultured as described (1). SH-SY5Y and GI-M-EN cells were purchased from DMSZ (Cat# ACC 209 and ACC 654, Braunschweig, Germany) and cultured as described (1). The cell line IMR5 was a gift from G. M. Brodeur (CHOP, Philadelphia, PA) and cultured in RPMI-1640 (Invitrogen, Carlsbad, CA) supplemented with 20% heat-inactivated fetal bovine serum (FBS; Biochrom Ltd, Cambridge, UK), 2 mM L-glutamine and 100 U/mL penicillin/streptomycin (Invitrogen) in an atmosphere of 5% CO<sub>2</sub> at 37°C. Human umbilical vein endothelial cells (HUVEC) were purchased from Sigma Aldrich (St. Louis, MO, Cat# 200-05N) and cultivated as previously described (2). LentiX cells were purchased from TaKaRa Bio Inc. (Kusatsu, Japan; Cat# 632180) and cultured in DMEM (Invitrogen) supplemented with 10% heat-inactivated FBS, 2mM L-glutamine and 100 U/mL penicillin/streptomycin in an atmosphere of 5% CO<sub>2</sub> at 37°C.

#### *Western blot analysis*

Western blots were performed as previously described (1). Membranes were probed with the primary antibodies: anti-CHD5 (Cat# 44829, 1:500; Cell Signaling Technology, Danvers, MA), and anti-GAPDH (Cat# 5G4 Mab 6C5 1:8000; HyTest Ltd., Turku, Finland), anti-PLCL1 (Cat# ab157200,1:2500; abcam, Cambridge, United Kingdom), anti-SERPINB6 (Cat# TA504055, 1:500; OriGene, Rockville, Maryland) and anti-p53 (Cat# AH00152, 1:2500; Invitrogen). For secondary antibodies HRP-labeled goat anti-

rabbit IgG (Cat# 65-6120, 1:2500-1:10000; Invitrogen) and goat anti-mouse (Cat# 170-6516, 1:15000; BioRad, Hercules, CA) were used.

Images were taken with the ChemiDoc MP Imaging System (BioRad) using the Image Lab analysis software (BioRad).

#### *Clonogenic growth assay*

A single cell suspension of transfected NB cells was seeded in clonal density ( $7.5 \times 10^2$  cells/well) in 6-well plates in complete medium with blasticidin. Blasticidin was added every second day and cells were incubated at standard conditions for 10 – 14 days. Colonies were stained with 3.7% paraformaldehyde-laced crystal violet and counted using Fiji (3).

#### *Metabolic activity assay*

MTT (Sigma Aldrich) metabolic activity assays were performed as described (4). Briefly  $2 \times 10^3$  (GI-M-EN),  $4 \times 10^3$  (SK-N-BE(2)C) or  $6 \times 10^3$  (IMR5 and SH-SY5Y) cells were seeded in 100  $\mu$ l complete medium containing blasticidin in 96 well plates. Results were calculated relative to day 1 from at least 5 wells per experimental condition.

#### *Soft agar clonogenicity assay*

Single cell suspensions of  $1 \times 10^3$  (IMR5, SK-N-BE(2)C) or  $2 \times 10^3$  (SH-SY5Y) cells/ml were prepared in 0.5% low melting point agarose (LMP agarose, Sigma Aldrich) diluted in the respective cell line medium and seeded in 24-well plates. Growth medium containing blasticidin was replaced twice a week until colonies became visible. For analysis, colonies were stained with 1 mg/ml MTT and counted using Fiji.

#### *Immunohistochemistry*

Immunohistochemistry of formalin-fixed, paraffin-embedded sections from 5 mice per group was performed using standard protocols. Briefly, sections were deparaffinized, pressure-cooked or microwaved in citrate buffer, permeabilized with 0.1% Triton-X-100 and blocked with 10% goat serum and avidin/biotin blocking reagent (DAKO, Waldbronn, Germany). A 1:50 dilution of mouse anti-human CD57 (Cat# CM164B; Biocare Medical, Pacheco, CA), 1:20 of rat anti-mouse CD31 (Cat# dia310; Dianova, Hamburg, Germany), 1:100 rabbit anti-human CHD5 (Cat# 44829; Cell Signaling Technology) or 1:200 of mouse anti-human Ki67 (Cat# M7240; DAKO) was applied overnight at 4°C. Slides were incubated with secondary antibody solution and a 1:750 dilution of streptavidin-AP (Dianova). The Dako REAL™ Detection System (DAKO) was used according to the manufacturer's protocol. CD31-positive tumor vessels were counted in at least five visual fields from two metastases at 200x magnification. The percentage of positively stained tumor cell nuclei was determined in four visual fields at 400x magnification. Stained samples were analyzed using Keyence BZ-9000 microscope.

## Supplementary Data

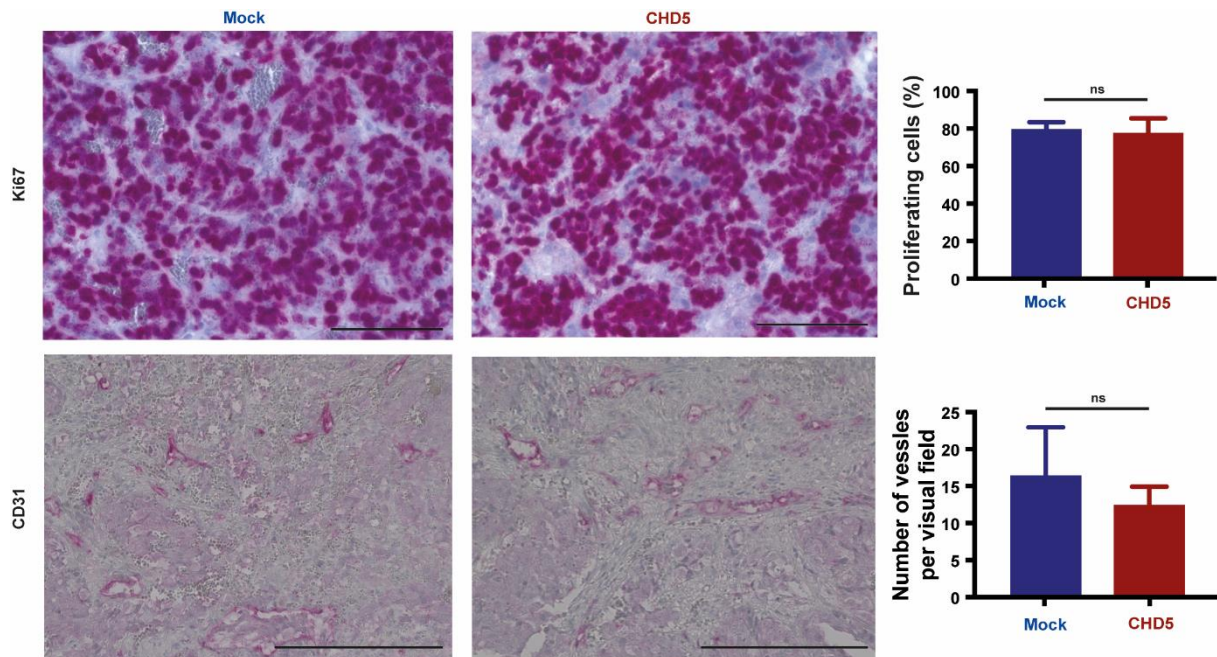

**Suppl. Fig. 1: Forced expression of CHD5 does not alter proliferation and vascularization in the metastases.**

Formalin-fixed, paraffin-embedded liver metastases from 5 mice per group sacrificed 28 d post cell injection were subjected to Ki67 and CD31 immunohistochemistry. At least 5 different visual fields from 2 metastases per mouse were analyzed. Representative pictures for each group are shown. Scale bar equals 100  $\mu$ m. Means and SD are shown for each group. Statistical analysis was performed using t-test. ns, not significant.

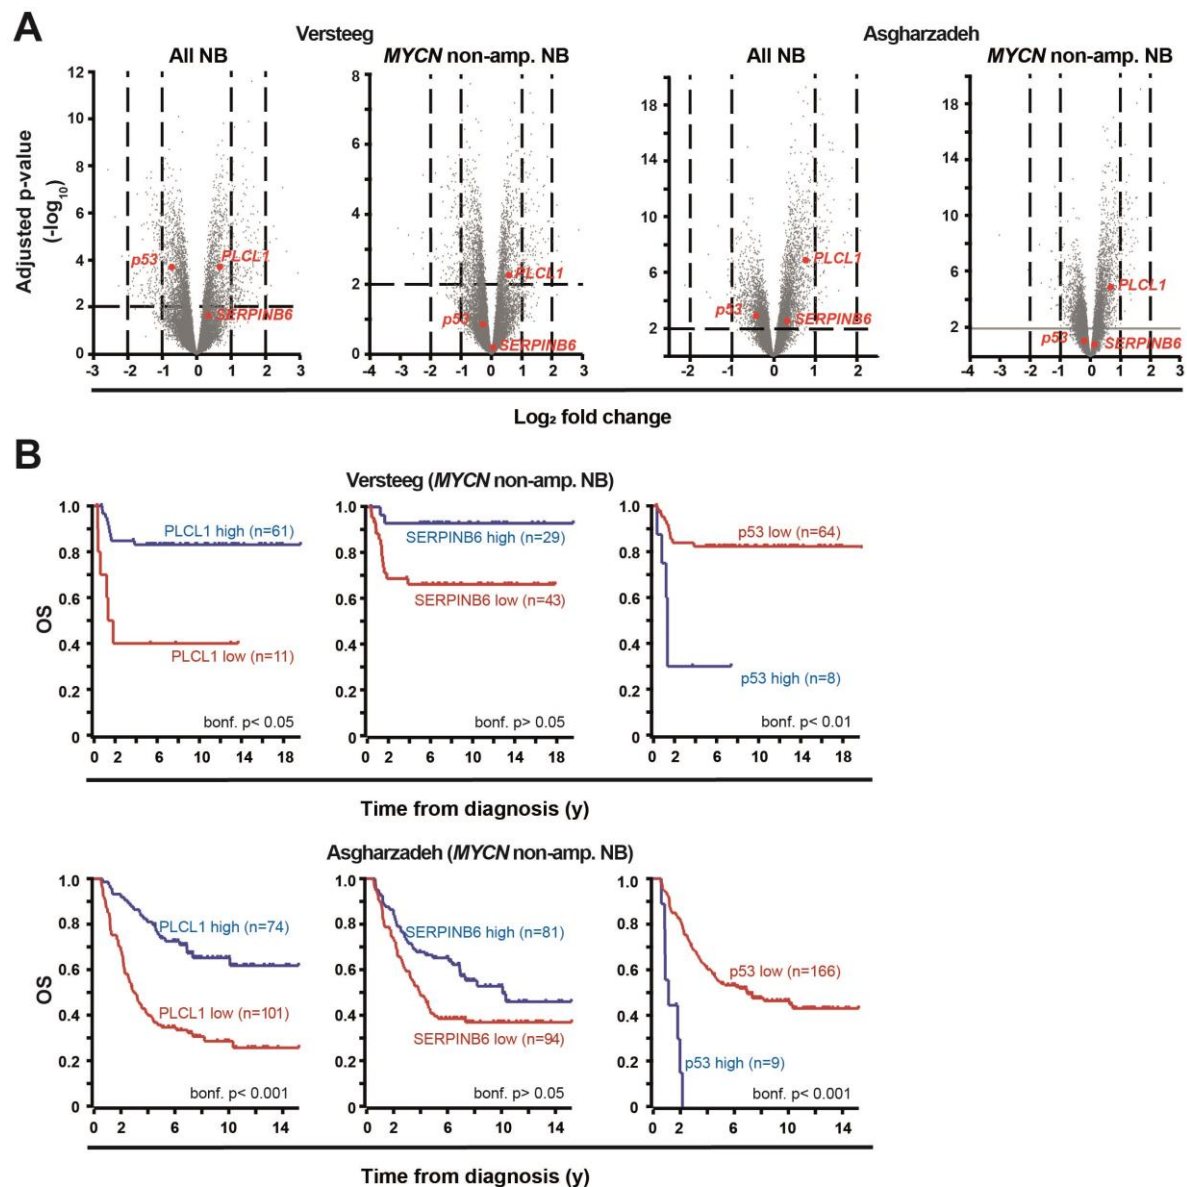

Suppl. Fig. 2: In additional data sets, too, PLCL1 contributes to the metastasis-inhibiting effect of CHD5 *in vitro* and *in situ*, and p53 *in vitro*.

**A. High PLCL1 expression in patient NB is associated with non-metastatic disease.** Gene expression depending on stage is shown in two different clinically annotated NB datasets (Asgharzadeh-249-custom-huex10t, n=247 and Versteeg GSE16476, n=76; R2 genomics analysis and visualization platform). Grey and red dots

in the volcano plot represent genes differentially expressed between stage 1-3 versus stage 4 patients.

**B. High PLCL1 expression is associated with increased overall survival.** Kaplan-Meier overall survival (OS) estimates for expression of PLCL1, SERPINB6 and p53 in *MYCN* non-amplified NB are shown. Results of the log-rank test are indicated. The cut-off was determined using the scanning method.

### Suppl. Tab. 1: Differentially expressed genes

The 52 differentially expressed genes determined by mRNA sequencing in IMR5 cells overexpressing CHD5 and control cells based on  $\log_2$  fold change  $< -0.2$  and  $> 0.2$  and p-adjusted  $< 0.05$  are listed. Shown are Ensembl gene identifiers, gene names and corresponding statistics.

|                 | Symbol     | $\log_2$ fold change | p-adjusted  |
|-----------------|------------|----------------------|-------------|
| ENSG00000116254 | CHD5       | 6.230134664          | 7.64167E-49 |
| ENSG00000136842 | TMOD1      | 2.364281273          | 2.71404E-07 |
| ENSG00000189067 | LITAF      | 1.952290454          | 0.037884172 |
| ENSG00000146592 | CREB5      | 1.766958876          | 1.38087E-06 |
| ENSG00000008283 | CYB561     | 1.532253924          | 0.011159054 |
| ENSG00000115896 | PLCL1      | 1.38862969           | 0.019906759 |
| ENSG00000274248 | AJ011932.1 | 1.260513323          | 0.04376635  |
| ENSG00000124570 | SERPINB6   | 1.192143374          | 2.33849E-05 |
| ENSG00000123240 | OPTN       | 1.125703228          | 0.032590037 |
| ENSG00000146216 | TTBK1      | 1.122963256          | 0.037884172 |
| ENSG00000139219 | COL2A1     | 0.998727929          | 1.64569E-09 |
| ENSG00000143507 | DUSP10     | 0.865205772          | 0.002482005 |
| ENSG00000141433 | ADCYAP1    | 0.858139544          | 1.38087E-06 |
| ENSG00000197106 | SLC6A17    | 0.849081948          | 7.07908E-06 |
| ENSG00000148357 | HMCN2      | 0.829589163          | 2.33849E-05 |
| ENSG00000157680 | DGKI       | 0.81291283           | 0.012306726 |
| ENSG00000177606 | JUN        | 0.768073061          | 1.2035E-07  |
| ENSG00000184785 | SMIM10     | 0.701760062          | 0.015728091 |
| ENSG00000054690 | PLEKHH1    | 0.686098205          | 0.018870801 |
| ENSG00000099250 | NRP1       | 0.636061911          | 6.5852E-06  |
| ENSG00000132932 | ATP8A2     | 0.633365392          | 0.04101218  |
| ENSG00000244300 | GATA2-AS1  | 0.625575596          | 0.014997842 |
| ENSG00000180537 | RNF182     | 0.613522431          | 0.00291682  |
| ENSG00000189056 | RELN       | 0.57470146           | 0.002482005 |
| ENSG00000135549 | PKIB       | 0.557194895          | 0.008904255 |
| ENSG00000164484 | TMEM200A   | 0.534469578          | 0.037884172 |
| ENSG00000176244 | ACBD7      | 0.52152602           | 0.020862063 |
| ENSG00000151690 | MFSD6      | 0.50979967           | 0.037884172 |
| ENSG00000091409 | ITGA6      | 0.481304804          | 0.019906759 |
| ENSG00000102362 | SYTL4      | 0.47111895           | 0.011643571 |
| ENSG00000149257 | SERPINH1   | 0.283722748          | 0.026258044 |
|                 |            |                      |             |
| ENSG00000038427 | VCAN       | -0.290533786         | 0.036059219 |
| ENSG00000145901 | TNIP1      | -0.349385355         | 0.032569478 |
| ENSG00000091947 | TMEM101    | -0.361884248         | 0.036059219 |
| ENSG00000134871 | COL4A2     | -0.394299113         | 0.034735636 |
| ENSG00000162599 | NFIA       | -0.433319098         | 0.032797045 |
| ENSG00000185070 | FLRT2      | -0.439240516         | 0.011643571 |

|                 |          |              |             |
|-----------------|----------|--------------|-------------|
| ENSG00000162998 | FRZB     | -0.450858832 | 0.049330907 |
| ENSG00000181418 | DDN      | -0.45884312  | 0.019906759 |
| ENSG00000101115 | SALL4    | -0.477171463 | 0.049929502 |
| ENSG00000065989 | PDE4A    | -0.537505133 | 0.014737817 |
| ENSG00000173068 | BNC2     | -0.560631079 | 0.02642434  |
| ENSG00000184226 | PCDH9    | -0.563992227 | 0.011643571 |
| ENSG00000145808 | ADAMTS19 | -0.619297173 | 0.032590037 |
| ENSG00000152284 | TCF7L1   | -0.636128798 | 0.027078037 |
| ENSG00000174498 | IGDCC3   | -0.661871887 | 9.58532E-09 |
| ENSG00000140937 | CDH11    | -0.669365983 | 0.001146073 |
| ENSG00000169946 | ZFPM2    | -0.679020625 | 0.003380899 |
| ENSG00000134853 | PDGFRA   | -0.739844789 | 5.68551E-06 |
| ENSG00000188729 | OSTN     | -0.91115143  | 0.002482005 |
| ENSG00000115461 | IGFBP5   | -1.117367211 | 0.001364205 |
| ENSG00000167680 | SEMA6B   | -1.242799993 | 3.07198E-13 |



## Supplementary References

1. Dorneburg C, Fischer M, Barth TFE, Mueller-Klieser W, Hero B, Gecht J, et al. LDHA in Neuroblastoma Is Associated with Poor Outcome and Its Depletion Decreases Neuroblastoma Growth Independent of Aerobic Glycolysis. *Clin Cancer Res*. 2018 Nov 15;24(22):5772–83.
2. Schlitter A-M, Dorneburg C, Barth TFE, Wahl J, Schulte JH, Brüderlein S, et al. CD57<sup>high</sup> Neuroblastoma Cells Have Aggressive Attributes Ex Situ and an Undifferentiated Phenotype in Patients. Ulasov I, editor. *PLoS ONE*. 2012 Aug 10;7(8):e42025.
3. Schindelin J, Arganda-Carreras I, Frise E, Kaynig V, Longair M, Pietzsch T, et al. Fiji: an open-source platform for biological-image analysis. *Nat Methods*. 2012 Jul;9(7):676–82.
4. Mosmann T. Rapid colorimetric assay for cellular growth and survival: Application to proliferation and cytotoxicity assays. *J Immunol Methods*. 1983 Dec;65(1–2):55–63.
